# Supplementary material for: Capsaicin determination and chili sauce discrimination using low-cost and portable electrochemical sensors based on all graphite pencil electrodes
Source: Royal Society of Chemistry journal article supplement (doi:10.1039/c6ay01754a), 2016-01-01

**Electronic Supplementary Information (ESI)**

**Capsaicin determination and chili sauce  
discrimination using low-cost and portable  
electrochemical sensors based on all graphite  
pencil electrodes**

Shixin Wu, Jiamin Zeng, Hong Xie and Sum Huan Ng\*

\* Singapore Institute of Manufacturing Technology, 73 Nanyang Drive, Singapore 637622. E-mail: shng@simtech.a-star.edu.sg; Tel: +65 67938382 (Dr. Sum Huan Ng).

**Fig. S1** Layout of the home-made electrochemical cell (left image) and pictures of the fabricated cell (middle and right images).

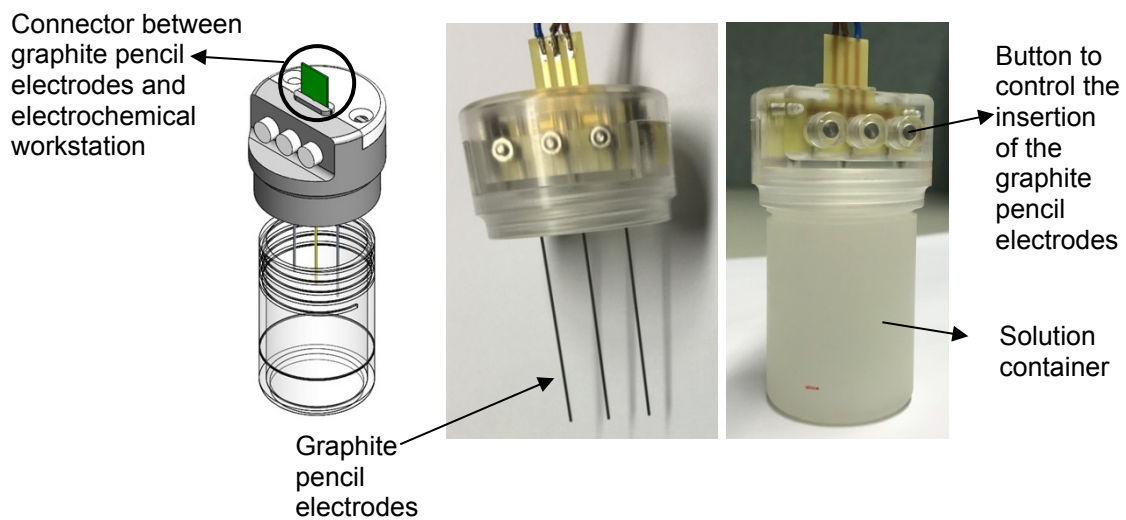

**Fig. S2** SEM images of (A) Pilot, (B) uni, (C) Pentel, (D) Ain and (E) OMNI PGEs taken at their bottom (base) surfaces.

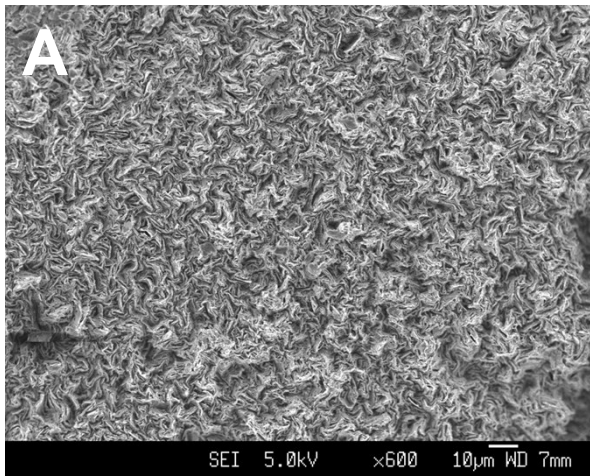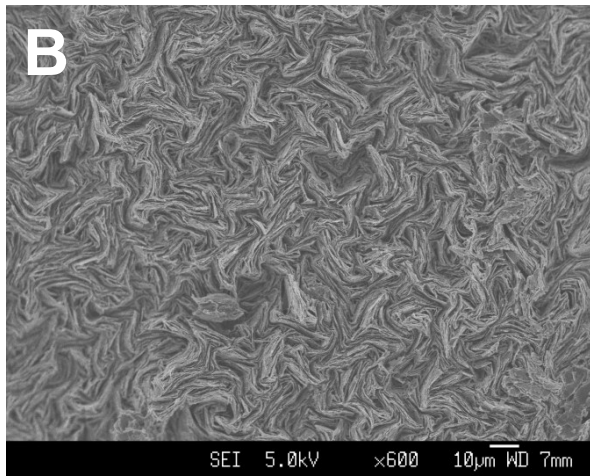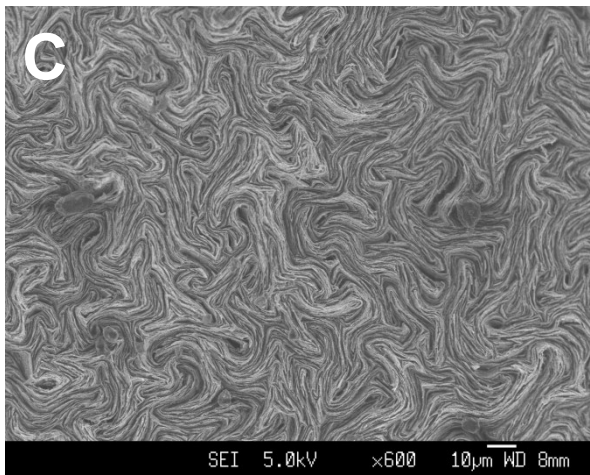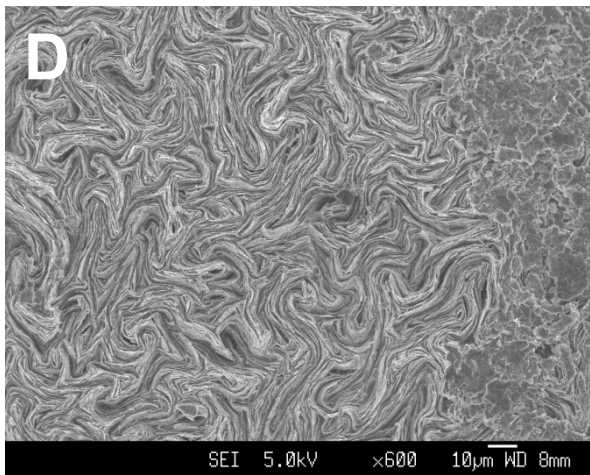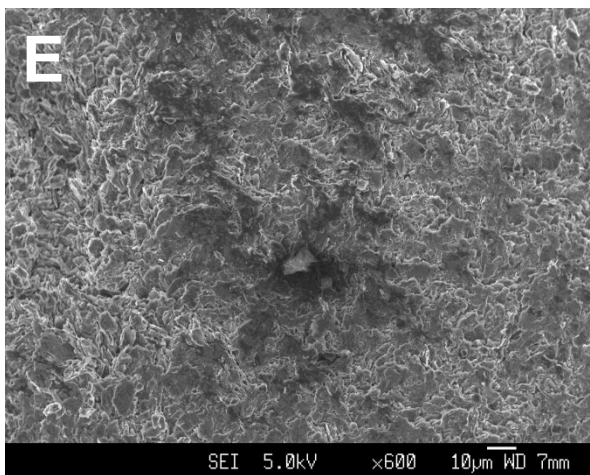

**Fig. S3** *k*-means clustering plot of different brands of chilli sauces based on PCA of  $I_{ap}$ .

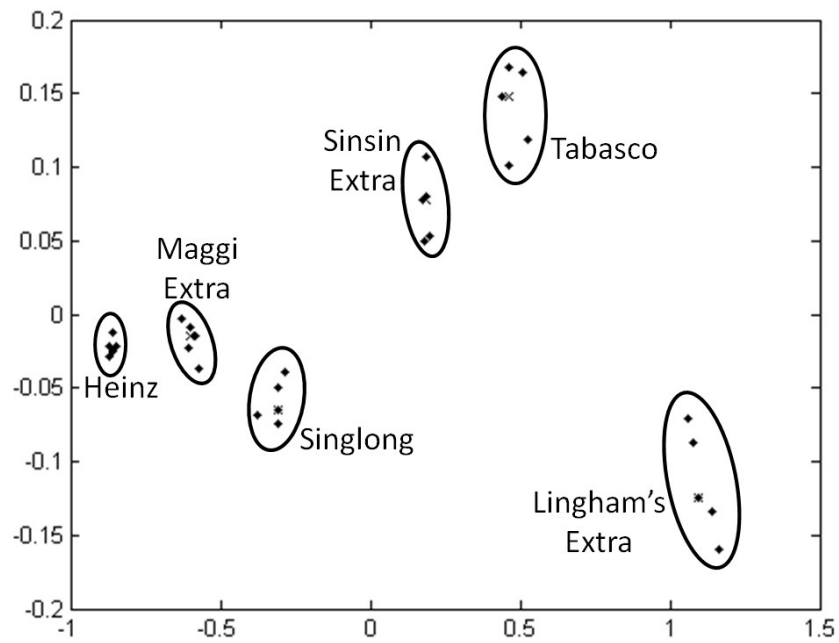

Supplement: c6ay01754a1.pdf [file c6ay01754a1.pdf]
